# Supplementary material for: Phylogenetic Characterisation of Crimean-Congo Hemorrhagic Fever Virus Detected in African Blue Ticks Feeding on Cattle in a Ugandan Abattoir
Source: Preprints.org preprint supplement (doi:10.20944/preprints202102.0089.v1), 2021-02-02
Supplement: Supplementary file 1 [file supplementary]

**A. CCHFV S segment nucleotide percentage identities.** Complete ORFs were aligned and pairwise percentage identities were calculated using CLUSTAL Omega.

|                   |    | DQ144418_DRC_1956 |    | DQ076413_UGA_1958 | Mbarara_UGA_2019 | MH178082_UGA_2015 | MF511221_ZAF_1985 | DQ211640_SEN_1972 | DQ211639_SEN_1979 | U88410_NGA_1966 | DQ211647_ZAF_1987 | DQ211646_ZAF_1985 | MF547415_ESP_2014 | DQ211641_MRT_1984 | MF287636_ESP_2016 | HQ378179_SDN_2009 | GQ862371_SDN_2008 | KX238958_NGA_2012 | DQ076416_ZAF_1981 | EY123122_CAF_1975 | KX013452_NGA_1965 | AF481802_RUS_2000 | DQ211643_RUS_1967 | DQ206447_RUS_2002 | AY277672_RUS_2000 | KR092375_TUR_2012 | GU477489_BGR_1981 | KJ027522_IRN_2013 | DQ211649_TUR_2003 | AF428144_KOS_2001 | DQ213507_KOS_2001 | MN866203_IND_2019 | DQ211645_OMN_1997 | MG659724_CHN_2017 | AF527810_PAK_1976 | U88414_PAK_1965 | HM452305_AFG_2009 | DQ446212_IRN_1952 | AY223475_UZB_1967 | AY049083_TJK_1990 | JF922674_IND_2011 | FJ562093_CHN_2004 | GU477494_CHN_2004 | AY297692_TJK_1990 | AF481799_UZB_1985 | U88413_CHN_1968 | AJ010648_CHN_1966 | DQ211638_GRC_1975 |    |    |    |    |    |    |    |    |    |    |    |    |    |    |    |    |    |    |    |    |    |    |    |    |    |    |    |    |    |    |    |    |    |    |    |    |    |    |    |    |    |    |    |    |    |    |    |    |    |    |    |    |    |    |    |    |    |    |    |    |    |    |    |    |    |    |    |    |    |    |    |    |    |    |    |    |    |    |    |    |    |    |    |    |    |    |    |    |    |    |    |    |    |    |    |    |    |    |    |    |    |    |    |    |    |    |    |    |    |    |    |    |    |    |    |    |    |    |    |    |    |    |    |    |    |    |    |    |    |    |    |    |    |    |    |    |    |    |    |    |    |    |    |    |    |    |    |    |    |    |    |    |    |    |    |    |    |    |    |    |    |    |    |    |    |    |    |    |    |    |    |    |    |    |    |    |    |    |    |    |    |    |    |    |    |    |    |    |    |    |    |    |    |    |    |    |    |    |    |    |    |    |    |    |    |    |    |    |    |    |    |    |    |    |    |    |    |    |    |    |    |    |    |    |    |    |    |    |    |    |    |    |    |    |    |    |    |    |    |    |    |    |    |    |    |    |    |    |    |    |    |    |    |    |    |    |    |    |    |    |    |    |    |    |    |    |    |    |    |    |    |    |    |    |    |    |    |    |    |    |    |    |    |    |    |    |    |    |    |    |    |    |    |    |    |    |    |    |    |    |    |    |    |    |    |    |    |    |    |    |    |    |    |    |    |    |    |    |    |    |    |    |    |    |    |    |    |    |    |    |    |    |    |    |    |    |    |    |    |    |    |    |    |    |    |    |    |    |    |    |    |    |    |    |    |    |    |    |    |    |    |    |    |    |    |    |    |    |    |    |    |    |    |    |    |    |    |    |    |    |    |    |    |    |    |    |    |    |    |    |    |    |    |    |    |    |    |    |    |    |    |    |    |    |    |    |    |    |    |    |    |    |    |    |    |    |    |    |    |    |    |    |    |    |    |    |    |    |    |    |    |    |    |    |    |    |    |    |    |    |    |    |    |    |    |    |    |    |    |    |    |    |    |    |    |    |    |    |    |    |    |    |    |    |    |    |    |    |    |    |    |    |    |    |    |    |    |    |    |    |    |    |    |    |    |    |    |    |    |    |    |    |    |    |    |    |    |    |    |    |    |    |    |    |    |    |    |    |    |    |    |    |    |    |    |    |    |    |    |    |    |    |    |    |    |    |    |    |    |    |    |    |    |    |    |    |    |    |    |    |    |    |    |    |    |    |    |    |    |    |    |    |    |    |    |    |    |    |    |    |    |    |    |    |    |    |    |    |    |    |    |    |    |    |    |    |    |    |    |    |    |    |    |    |    |    |    |    |    |    |    |    |    |    |    |    |    |    |    |    |    |    |    |    |
|-------------------|----|-------------------|----|-------------------|------------------|-------------------|-------------------|-------------------|-------------------|-----------------|-------------------|-------------------|-------------------|-------------------|-------------------|-------------------|-------------------|-------------------|-------------------|-------------------|-------------------|-------------------|-------------------|-------------------|-------------------|-------------------|-------------------|-------------------|-------------------|-------------------|-------------------|-------------------|-------------------|-------------------|-------------------|-----------------|-------------------|-------------------|-------------------|-------------------|-------------------|-------------------|-------------------|-------------------|-------------------|-----------------|-------------------|-------------------|----|----|----|----|----|----|----|----|----|----|----|----|----|----|----|----|----|----|----|----|----|----|----|----|----|----|----|----|----|----|----|----|----|----|----|----|----|----|----|----|----|----|----|----|----|----|----|----|----|----|----|----|----|----|----|----|----|----|----|----|----|----|----|----|----|----|----|----|----|----|----|----|----|----|----|----|----|----|----|----|----|----|----|----|----|----|----|----|----|----|----|----|----|----|----|----|----|----|----|----|----|----|----|----|----|----|----|----|----|----|----|----|----|----|----|----|----|----|----|----|----|----|----|----|----|----|----|----|----|----|----|----|----|----|----|----|----|----|----|----|----|----|----|----|----|----|----|----|----|----|----|----|----|----|----|----|----|----|----|----|----|----|----|----|----|----|----|----|----|----|----|----|----|----|----|----|----|----|----|----|----|----|----|----|----|----|----|----|----|----|----|----|----|----|----|----|----|----|----|----|----|----|----|----|----|----|----|----|----|----|----|----|----|----|----|----|----|----|----|----|----|----|----|----|----|----|----|----|----|----|----|----|----|----|----|----|----|----|----|----|----|----|----|----|----|----|----|----|----|----|----|----|----|----|----|----|----|----|----|----|----|----|----|----|----|----|----|----|----|----|----|----|----|----|----|----|----|----|----|----|----|----|----|----|----|----|----|----|----|----|----|----|----|----|----|----|----|----|----|----|----|----|----|----|----|----|----|----|----|----|----|----|----|----|----|----|----|----|----|----|----|----|----|----|----|----|----|----|----|----|----|----|----|----|----|----|----|----|----|----|----|----|----|----|----|----|----|----|----|----|----|----|----|----|----|----|----|----|----|----|----|----|----|----|----|----|----|----|----|----|----|----|----|----|----|----|----|----|----|----|----|----|----|----|----|----|----|----|----|----|----|----|----|----|----|----|----|----|----|----|----|----|----|----|----|----|----|----|----|----|----|----|----|----|----|----|----|----|----|----|----|----|----|----|----|----|----|----|----|----|----|----|----|----|----|----|----|----|----|----|----|----|----|----|----|----|----|----|----|----|----|----|----|----|----|----|----|----|----|----|----|----|----|----|----|----|----|----|----|----|----|----|----|----|----|----|----|----|----|----|----|----|----|----|----|----|----|----|----|----|----|----|----|----|----|----|----|----|----|----|----|----|----|----|----|----|----|----|----|----|----|----|----|----|----|----|----|----|----|----|----|----|----|----|----|----|----|----|----|----|----|----|----|----|----|----|----|----|----|----|----|----|----|----|----|----|----|----|----|----|----|----|----|----|----|----|----|----|----|----|----|----|----|----|----|----|----|----|----|----|----|----|----|----|----|----|----|----|----|----|----|----|----|----|----|----|----|----|----|----|----|----|----|----|----|----|----|----|----|----|----|----|----|----|
| DQ144418_DRC_1956 |    |                   | 96 | 93                | 92               | 92                | 84                | 83                | 85                | 86              | 86                | 86                | 86                | 86                | 85                | 85                | 86                | 85                | 86                | 85                | 87                | 87                | 87                | 87                | 86                | 86                | 86                | 87                | 87                | 87                | 87                | 86                | 86                | 86                | 86                | 86              | 86                | 86                | 86                | 87                | 88                | 88                | 87                | 87                | 88                | 88              | 88                | 88                | 88 | 82 |    |    |    |    |    |    |    |    |    |    |    |    |    |    |    |    |    |    |    |    |    |    |    |    |    |    |    |    |    |    |    |    |    |    |    |    |    |    |    |    |    |    |    |    |    |    |    |    |    |    |    |    |    |    |    |    |    |    |    |    |    |    |    |    |    |    |    |    |    |    |    |    |    |    |    |    |    |    |    |    |    |    |    |    |    |    |    |    |    |    |    |    |    |    |    |    |    |    |    |    |    |    |    |    |    |    |    |    |    |    |    |    |    |    |    |    |    |    |    |    |    |    |    |    |    |    |    |    |    |    |    |    |    |    |    |    |    |    |    |    |    |    |    |    |    |    |    |    |    |    |    |    |    |    |    |    |    |    |    |    |    |    |    |    |    |    |    |    |    |    |    |    |    |    |    |    |    |    |    |    |    |    |    |    |    |    |    |    |    |    |    |    |    |    |    |    |    |    |    |    |    |    |    |    |    |    |    |    |    |    |    |    |    |    |    |    |    |    |    |    |    |    |    |    |    |    |    |    |    |    |    |    |    |    |    |    |    |    |    |    |    |    |    |    |    |    |    |    |    |    |    |    |    |    |    |    |    |    |    |    |    |    |    |    |    |    |    |    |    |    |    |    |    |    |    |    |    |    |    |    |    |    |    |    |    |    |    |    |    |    |    |    |    |    |    |    |    |    |    |    |    |    |    |    |    |    |    |    |    |    |    |    |    |    |    |    |    |    |    |    |    |    |    |    |    |    |    |    |    |    |    |    |    |    |    |    |    |    |    |    |    |    |    |    |    |    |    |    |    |    |    |    |    |    |    |    |    |    |    |    |    |    |    |    |    |    |    |    |    |    |    |    |    |    |    |    |    |    |    |    |    |    |    |    |    |    |    |    |    |    |    |    |    |    |    |    |    |    |    |    |    |    |    |    |    |    |    |    |    |    |    |    |    |    |    |    |    |    |    |    |    |    |    |    |    |    |    |    |    |    |    |    |    |    |    |    |    |    |    |    |    |    |    |    |    |    |    |    |    |    |    |    |    |    |    |    |    |    |    |    |    |    |    |    |    |    |    |    |    |    |    |    |    |    |    |    |    |    |    |    |    |    |    |    |    |    |    |    |    |    |    |    |    |    |    |    |    |    |    |    |    |    |    |    |    |    |    |    |    |    |    |    |    |    |    |    |    |    |    |    |    |    |    |    |    |    |    |    |    |    |    |    |    |    |    |    |    |    |    |    |    |    |    |    |    |    |    |    |    |    |    |    |    |    |    |    |    |    |    |    |    |    |    |    |    |    |    |    |    |    |    |    |    |    |    |    |    |    |    |    |    |    |    |    |    |    |    |    |    |    |    |    |    |    |    |    |    |    |    |    |    |    |
| DQ076413_UGA_1958 | 96 |                   |    | 92                | 91               | 92                | 83                | 83                | 85                | 86              | 86                | 85                | 85                | 85                | 85                | 85                | 85                | 85                | 85                | 86                | 85                | 87                | 86                | 87                | 87                | 86                | 86                | 87                | 87                | 87                | 86                | 86                | 86                | 86                | 86                | 86              | 86                | 86                | 86                | 86                | 87                | 87                | 87                | 87                | 86                | 87              | 87                | 86                | 87 | 82 |    |    |    |    |    |    |    |    |    |    |    |    |    |    |    |    |    |    |    |    |    |    |    |    |    |    |    |    |    |    |    |    |    |    |    |    |    |    |    |    |    |    |    |    |    |    |    |    |    |    |    |    |    |    |    |    |    |    |    |    |    |    |    |    |    |    |    |    |    |    |    |    |    |    |    |    |    |    |    |    |    |    |    |    |    |    |    |    |    |    |    |    |    |    |    |    |    |    |    |    |    |    |    |    |    |    |    |    |    |    |    |    |    |    |    |    |    |    |    |    |    |    |    |    |    |    |    |    |    |    |    |    |    |    |    |    |    |    |    |    |    |    |    |    |    |    |    |    |    |    |    |    |    |    |    |    |    |    |    |    |    |    |    |    |    |    |    |    |    |    |    |    |    |    |    |    |    |    |    |    |    |    |    |    |    |    |    |    |    |    |    |    |    |    |    |    |    |    |    |    |    |    |    |    |    |    |    |    |    |    |    |    |    |    |    |    |    |    |    |    |    |    |    |    |    |    |    |    |    |    |    |    |    |    |    |    |    |    |    |    |    |    |    |    |    |    |    |    |    |    |    |    |    |    |    |    |    |    |    |    |    |    |    |    |    |    |    |    |    |    |    |    |    |    |    |    |    |    |    |    |    |    |    |    |    |    |    |    |    |    |    |    |    |    |    |    |    |    |    |    |    |    |    |    |    |    |    |    |    |    |    |    |    |    |    |    |    |    |    |    |    |    |    |    |    |    |    |    |    |    |    |    |    |    |    |    |    |    |    |    |    |    |    |    |    |    |    |    |    |    |    |    |    |    |    |    |    |    |    |    |    |    |    |    |    |    |    |    |    |    |    |    |    |    |    |    |    |    |    |    |    |    |    |    |    |    |    |    |    |    |    |    |    |    |    |    |    |    |    |    |    |    |    |    |    |    |    |    |    |    |    |    |    |    |    |    |    |    |    |    |    |    |    |    |    |    |    |    |    |    |    |    |    |    |    |    |    |    |    |    |    |    |    |    |    |    |    |    |    |    |    |    |    |    |    |    |    |    |    |    |    |    |    |    |    |    |    |    |    |    |    |    |    |    |    |    |    |    |    |    |    |    |    |    |    |    |    |    |    |    |    |    |    |    |    |    |    |    |    |    |    |    |    |    |    |    |    |    |    |    |    |    |    |    |    |    |    |    |    |    |    |    |    |    |    |    |    |    |    |    |    |    |    |    |    |    |    |    |    |    |    |    |    |    |    |    |    |    |    |    |    |    |    |    |    |    |    |    |    |    |    |    |    |    |    |    |    |    |    |    |    |    |    |    |    |    |    |    |    |    |    |    |    |    |    |    |    |    |    |    |    |    |    |    |    |    |    |    |    |    |    |    |
| Mbarara_UGA_2019  | 93 | 92                |    |                   | 94               | 94                | 84                | 84                | 85                | 86              | 86                | 86                | 85                | 85                | 85                | 85                | 85                | 85                | 85                | 85                | 85                | 86                | 86                | 86                | 86                | 86                | 86                | 86                | 86                | 86                | 86                | 86                | 86                | 86                | 86                | 86              | 86                | 86                | 86                | 86                | 87                | 88                | 87                | 87                | 87                | 87              | 87                | 87                | 87 | 82 |    |    |    |    |    |    |    |    |    |    |    |    |    |    |    |    |    |    |    |    |    |    |    |    |    |    |    |    |    |    |    |    |    |    |    |    |    |    |    |    |    |    |    |    |    |    |    |    |    |    |    |    |    |    |    |    |    |    |    |    |    |    |    |    |    |    |    |    |    |    |    |    |    |    |    |    |    |    |    |    |    |    |    |    |    |    |    |    |    |    |    |    |    |    |    |    |    |    |    |    |    |    |    |    |    |    |    |    |    |    |    |    |    |    |    |    |    |    |    |    |    |    |    |    |    |    |    |    |    |    |    |    |    |    |    |    |    |    |    |    |    |    |    |    |    |    |    |    |    |    |    |    |    |    |    |    |    |    |    |    |    |    |    |    |    |    |    |    |    |    |    |    |    |    |    |    |    |    |    |    |    |    |    |    |    |    |    |    |    |    |    |    |    |    |    |    |    |    |    |    |    |    |    |    |    |    |    |    |    |    |    |    |    |    |    |    |    |    |    |    |    |    |    |    |    |    |    |    |    |    |    |    |    |    |    |    |    |    |    |    |    |    |    |    |    |    |    |    |    |    |    |    |    |    |    |    |    |    |    |    |    |    |    |    |    |    |    |    |    |    |    |    |    |    |    |    |    |    |    |    |    |    |    |    |    |    |    |    |    |    |    |    |    |    |    |    |    |    |    |    |    |    |    |    |    |    |    |    |    |    |    |    |    |    |    |    |    |    |    |    |    |    |    |    |    |    |    |    |    |    |    |    |    |    |    |    |    |    |    |    |    |    |    |    |    |    |    |    |    |    |    |    |    |    |    |    |    |    |    |    |    |    |    |    |    |    |    |    |    |    |    |    |    |    |    |    |    |    |    |    |    |    |    |    |    |    |    |    |    |    |    |    |    |    |    |    |    |    |    |    |    |    |    |    |    |    |    |    |    |    |    |    |    |    |    |    |    |    |    |    |    |    |    |    |    |    |    |    |    |    |    |    |    |    |    |    |    |    |    |    |    |    |    |    |    |    |    |    |    |    |    |    |    |    |    |    |    |    |    |    |    |    |    |    |    |    |    |    |    |    |    |    |    |    |    |    |    |    |    |    |    |    |    |    |    |    |    |    |    |    |    |    |    |    |    |    |    |    |    |    |    |    |    |    |    |    |    |    |    |    |    |    |    |    |    |    |    |    |    |    |    |    |    |    |    |    |    |    |    |    |    |    |    |    |    |    |    |    |    |    |    |    |    |    |    |    |    |    |    |    |    |    |    |    |    |    |    |    |    |    |    |    |    |    |    |    |    |    |    |    |    |    |    |    |    |    |    |    |    |    |    |    |    |    |    |    |    |    |    |    |    |    |    |    |    |    |    |    |    |    |    |    |
| MH178082_UGA_2015 | 92 | 91                | 94 |                   |                  | 94                | 84                | 84                | 85                | 86              | 86                | 85                | 85                | 85                | 85                | 85                | 85                | 85                | 85                | 85                | 85                | 86                | 87                | 87                | 87                | 86                | 86                | 86                | 86                | 86                | 86                | 86                | 86                | 86                | 86                | 86              | 86                | 86                | 86                | 86                | 86                | 87                | 87                | 87                | 87                | 86              | 87                | 87                | 87 | 88 | 83 |    |    |    |    |    |    |    |    |    |    |    |    |    |    |    |    |    |    |    |    |    |    |    |    |    |    |    |    |    |    |    |    |    |    |    |    |    |    |    |    |    |    |    |    |    |    |    |    |    |    |    |    |    |    |    |    |    |    |    |    |    |    |    |    |    |    |    |    |    |    |    |    |    |    |    |    |    |    |    |    |    |    |    |    |    |    |    |    |    |    |    |    |    |    |    |    |    |    |    |    |    |    |    |    |    |    |    |    |    |    |    |    |    |    |    |    |    |    |    |    |    |    |    |    |    |    |    |    |    |    |    |    |    |    |    |    |    |    |    |    |    |    |    |    |    |    |    |    |    |    |    |    |    |    |    |    |    |    |    |    |    |    |    |    |    |    |    |    |    |    |    |    |    |    |    |    |    |    |    |    |    |    |    |    |    |    |    |    |    |    |    |    |    |    |    |    |    |    |    |    |    |    |    |    |    |    |    |    |    |    |    |    |    |    |    |    |    |    |    |    |    |    |    |    |    |    |    |    |    |    |    |    |    |    |    |    |    |    |    |    |    |    |    |    |    |    |    |    |    |    |    |    |    |    |    |    |    |    |    |    |    |    |    |    |    |    |    |    |    |    |    |    |    |    |    |    |    |    |    |    |    |    |    |    |    |    |    |    |    |    |    |    |    |    |    |    |    |    |    |    |    |    |    |    |    |    |    |    |    |    |    |    |    |    |    |    |    |    |    |    |    |    |    |    |    |    |    |    |    |    |    |    |    |    |    |    |    |    |    |    |    |    |    |    |    |    |    |    |    |    |    |    |    |    |    |    |    |    |    |    |    |    |    |    |    |    |    |    |    |    |    |    |    |    |    |    |    |    |    |    |    |    |    |    |    |    |    |    |    |    |    |    |    |    |    |    |    |    |    |    |    |    |    |    |    |    |    |    |    |    |    |    |    |    |    |    |    |    |    |    |    |    |    |    |    |    |    |    |    |    |    |    |    |    |    |    |    |    |    |    |    |    |    |    |    |    |    |    |    |    |    |    |    |    |    |    |    |    |    |    |    |    |    |    |    |    |    |    |    |    |    |    |    |    |    |    |    |    |    |    |    |    |    |    |    |    |    |    |    |    |    |    |    |    |    |    |    |    |    |    |    |    |    |    |    |    |    |    |    |    |    |    |    |    |    |    |    |    |    |    |    |    |    |    |    |    |    |    |    |    |    |    |    |    |    |    |    |    |    |    |    |    |    |    |    |    |    |    |    |    |    |    |    |    |    |    |    |    |    |    |    |    |    |    |    |    |    |    |    |    |    |    |    |    |    |    |    |    |    |    |    |    |    |    |    |    |    |    |    |    |    |    |    |    |    |    |    |    |    |    |    |
| MF511221_ZAF_1985 | 92 | 92                | 94 | 94                |                  |                   | 83                | 83                | 85                | 86              | 86                | 85                | 85                | 85                | 85                | 85                | 85                | 85                | 85                | 85                | 85                | 86                | 87                | 87                | 86                | 86                | 86                | 87                | 87                | 87                | 87                | 87                | 86                | 87                | 87                | 87              | 86                | 86                | 86                | 86                | 86                | 86                | 86                | 86                | 86                | 86              | 86                | 86                | 86 | 82 |    |    |    |    |    |    |    |    |    |    |    |    |    |    |    |    |    |    |    |    |    |    |    |    |    |    |    |    |    |    |    |    |    |    |    |    |    |    |    |    |    |    |    |    |    |    |    |    |    |    |    |    |    |    |    |    |    |    |    |    |    |    |    |    |    |    |    |    |    |    |    |    |    |    |    |    |    |    |    |    |    |    |    |    |    |    |    |    |    |    |    |    |    |    |    |    |    |    |    |    |    |    |    |    |    |    |    |    |    |    |    |    |    |    |    |    |    |    |    |    |    |    |    |    |    |    |    |    |    |    |    |    |    |    |    |    |    |    |    |    |    |    |    |    |    |    |    |    |    |    |    |    |    |    |    |    |    |    |    |    |    |    |    |    |    |    |    |    |    |    |    |    |    |    |    |    |    |    |    |    |    |    |    |    |    |    |    |    |    |    |    |    |    |    |    |    |    |    |    |    |    |    |    |    |    |    |    |    |    |    |    |    |    |    |    |    |    |    |    |    |    |    |    |    |    |    |    |    |    |    |    |    |    |    |    |    |    |    |    |    |    |    |    |    |    |    |    |    |    |    |    |    |    |    |    |    |    |    |    |    |    |    |    |    |    |    |    |    |    |    |    |    |    |    |    |    |    |    |    |    |    |    |    |    |    |    |    |    |    |    |    |    |    |    |    |    |    |    |    |    |    |    |    |    |    |    |    |    |    |    |    |    |    |    |    |    |    |    |    |    |    |    |    |    |    |    |    |    |    |    |    |    |    |    |    |    |    |    |    |    |    |    |    |    |    |    |    |    |    |    |    |    |    |    |    |    |    |    |    |    |    |    |    |    |    |    |    |    |    |    |    |    |    |    |    |    |    |    |    |    |    |    |    |    |    |    |    |    |    |    |    |    |    |    |    |    |    |    |    |    |    |    |    |    |    |    |    |    |    |    |    |    |    |    |    |    |    |    |    |    |    |    |    |    |    |    |    |    |    |    |    |    |    |    |    |    |    |    |    |    |    |    |    |    |    |    |    |    |    |    |    |    |    |    |    |    |    |    |    |    |    |    |    |    |    |    |    |    |    |    |    |    |    |    |    |    |    |    |    |    |    |    |    |    |    |    |    |    |    |    |    |    |    |    |    |    |    |    |    |    |    |    |    |    |    |    |    |    |    |    |    |    |    |    |    |    |    |    |    |    |    |    |    |    |    |    |    |    |    |    |    |    |    |    |    |    |    |    |    |    |    |    |    |    |    |    |    |    |    |    |    |    |    |    |    |    |    |    |    |    |    |    |    |    |    |    |    |    |    |    |    |    |    |    |    |    |    |    |    |    |    |    |    |    |    |    |    |    |    |    |    |    |    |    |    |    |    |    |    |    |    |    |
| DQ211640_SEN_1972 | 84 | 83                | 84 | 84                | 83               |                   |                   | 99                | 83                | 84              | 84                | 84                | 84                | 84                | 85                | 84                | 84                | 84                | 84                | 82                | 83                | 83                | 83                | 83                | 83                | 83                | 84                | 84                | 84                | 84                | 84                | 84                | 84                | 84                | 84                | 84              | 84                | 84                | 84                | 84                | 84                | 84                | 84                | 84                | 84                | 84              | 84                | 84                | 84 | 83 |    |    |    |    |    |    |    |    |    |    |    |    |    |    |    |    |    |    |    |    |    |    |    |    |    |    |    |    |    |    |    |    |    |    |    |    |    |    |    |    |    |    |    |    |    |    |    |    |    |    |    |    |    |    |    |    |    |    |    |    |    |    |    |    |    |    |    |    |    |    |    |    |    |    |    |    |    |    |    |    |    |    |    |    |    |    |    |    |    |    |    |    |    |    |    |    |    |    |    |    |    |    |    |    |    |    |    |    |    |    |    |    |    |    |    |    |    |    |    |    |    |    |    |    |    |    |    |    |    |    |    |    |    |    |    |    |    |    |    |    |    |    |    |    |    |    |    |    |    |    |    |    |    |    |    |    |    |    |    |    |    |    |    |    |    |    |    |    |    |    |    |    |    |    |    |    |    |    |    |    |    |    |    |    |    |    |    |    |    |    |    |    |    |    |    |    |    |    |    |    |    |    |    |    |    |    |    |    |    |    |    |    |    |    |    |    |    |    |    |    |    |    |    |    |    |    |    |    |    |    |    |    |    |    |    |    |    |    |    |    |    |    |    |    |    |    |    |    |    |    |    |    |    |    |    |    |    |    |    |    |    |    |    |    |    |    |    |    |    |    |    |    |    |    |    |    |    |    |    |    |    |    |    |    |    |    |    |    |    |    |    |    |    |    |    |    |    |    |    |    |    |    |    |    |    |    |    |    |    |    |    |    |    |    |    |    |    |    |    |    |    |    |    |    |    |    |    |    |    |    |    |    |    |    |    |    |    |    |    |    |    |    |    |    |    |    |    |    |    |    |    |    |    |    |    |    |    |    |    |    |    |    |    |    |    |    |    |    |    |    |    |    |    |    |    |    |    |    |    |    |    |    |    |    |    |    |    |    |    |    |    |    |    |    |    |    |    |    |    |    |    |    |    |    |    |    |    |    |    |    |    |    |    |    |    |    |    |    |    |    |    |    |    |    |    |    |    |    |    |    |    |    |    |    |    |    |    |    |    |    |    |    |    |    |    |    |    |    |    |    |    |    |    |    |    |    |    |    |    |    |    |    |    |    |    |    |    |    |    |    |    |    |    |    |    |    |    |    |    |    |    |    |    |    |    |    |    |    |    |    |    |    |    |    |    |    |    |    |    |    |    |    |    |    |    |    |    |    |    |    |    |    |    |    |    |    |    |    |    |    |    |    |    |    |    |    |    |    |    |    |    |    |    |    |    |    |    |    |    |    |    |    |    |    |    |    |    |    |    |    |    |    |    |    |    |    |    |    |    |    |    |    |    |    |    |    |    |    |    |    |    |    |    |    |    |    |    |    |    |    |    |    |    |    |    |    |    |    |    |    |    |    |    |    |    |    |    |    |    |    |    |    |
| DQ211639_SEN_1979 | 83 | 83                | 84 | 84                | 83               | 99                |                   |                   | 83                | 83              | 84                | 84                | 84                | 84                | 84                | 84                | 84                | 83                | 84                | 83                | 83                | 83                | 83                | 83                | 83                | 83                | 84                | 84                | 84                | 84                | 84                | 84                | 84                | 83                | 84                | 84              | 84                | 84                | 84                | 84                | 84                | 84                | 84                | 84                | 84                | 84              | 84                | 84                | 83 |    |    |    |    |    |    |    |    |    |    |    |    |    |    |    |    |    |    |    |    |    |    |    |    |    |    |    |    |    |    |    |    |    |    |    |    |    |    |    |    |    |    |    |    |    |    |    |    |    |    |    |    |    |    |    |    |    |    |    |    |    |    |    |    |    |    |    |    |    |    |    |    |    |    |    |    |    |    |    |    |    |    |    |    |    |    |    |    |    |    |    |    |    |    |    |    |    |    |    |    |    |    |    |    |    |    |    |    |    |    |    |    |    |    |    |    |    |    |    |    |    |    |    |    |    |    |    |    |    |    |    |    |    |    |    |    |    |    |    |    |    |    |    |    |    |    |    |    |    |    |    |    |    |    |    |    |    |    |    |    |    |    |    |    |    |    |    |    |    |    |    |    |    |    |    |    |    |    |    |    |    |    |    |    |    |    |    |    |    |    |    |    |    |    |    |    |    |    |    |    |    |    |    |    |    |    |    |    |    |    |    |    |    |    |    |    |    |    |    |    |    |    |    |    |    |    |    |    |    |    |    |    |    |    |    |    |    |    |    |    |    |    |    |    |    |    |    |    |    |    |    |    |    |    |    |    |    |    |    |    |    |    |    |    |    |    |    |    |    |    |    |    |    |    |    |    |    |    |    |    |    |    |    |    |    |    |    |    |    |    |    |    |    |    |    |    |    |    |    |    |    |    |    |    |    |    |    |    |    |    |    |    |    |    |    |    |    |    |    |    |    |    |    |    |    |    |    |    |    |    |    |    |    |    |    |    |    |    |    |    |    |    |    |    |    |    |    |    |    |    |    |    |    |    |    |    |    |    |    |    |    |    |    |    |    |    |    |    |    |    |    |    |    |    |    |    |    |    |    |    |    |    |    |    |    |    |    |    |    |    |    |    |    |    |    |    |    |    |    |    |    |    |    |    |    |    |    |    |    |    |    |    |    |    |    |    |    |    |    |    |    |    |    |    |    |    |    |    |    |    |    |    |    |    |    |    |    |    |    |    |    |    |    |    |    |    |    |    |    |    |    |    |    |    |    |    |    |    |    |    |    |    |    |    |    |    |    |    |    |    |    |    |    |    |    |    |    |    |    |    |    |    |    |    |    |    |    |    |    |    |    |    |    |    |    |    |    |    |    |    |    |    |    |    |    |    |    |    |    |    |    |    |    |    |    |    |    |    |    |    |    |    |    |    |    |    |    |    |    |    |    |    |    |    |    |    |    |    |    |    |    |    |    |    |    |    |    |    |    |    |    |    |    |    |    |    |    |    |    |    |    |    |    |    |    |    |    |    |    |    |    |    |    |    |    |    |    |    |    |    |    |    |    |    |    |    |    |    |    |    |    |    |    |    |    |    |    |    |    |    |    |    |    |
| U88410_NGA_1966   | 85 | 85                | 85 | 85                | 85               | 83                | 83                |                   |                   | 93              | 93                | 92                | 92                | 92                | 92                | 92                | 93                | 93                | 86                | 86                | 86                | 86                | 86                | 86                | 86                | 86                | 86                | 86                | 86                | 86                | 86                | 86                | 86                | 86                | 86                | 86              | 86                | 86                | 86                | 86                | 86                | 86                | 86                | 86                | 86                | 86              | 86                | 86                | 86 | 86 | 86 | 86 | 86 | 86 | 86 | 86 | 86 | 86 | 86 | 86 | 86 | 86 | 86 | 86 | 86 | 86 | 86 | 86 | 86 | 86 | 86 | 86 | 86 | 86 | 86 | 86 | 86 | 86 | 86 | 86 | 86 | 86 | 86 | 86 | 86 | 86 | 86 | 86 | 86 | 86 | 86 | 86 | 86 | 86 | 86 | 86 | 86 | 86 | 86 | 86 | 86 | 86 | 86 | 86 | 86 | 86 | 86 | 86 | 86 | 86 | 86 | 86 | 86 | 86 | 86 | 86 | 86 | 86 | 86 | 86 | 86 | 86 | 86 | 86 | 86 | 86 | 86 | 86 | 86 | 86 | 86 | 86 | 86 | 86 | 86 | 86 | 86 | 86 | 86 | 86 | 86 | 86 | 86 | 86 | 86 | 86 | 86 | 86 | 86 | 86 | 86 | 86 | 86 | 86 | 86 | 86 | 86 | 86 | 86 | 86 | 86 | 86 | 86 | 86 | 86 | 86 | 86 | 86 | 86 | 86 | 86 | 86 | 86 | 86 | 86 | 86 | 86 | 86 | 86 | 86 | 86 | 86 | 86 | 86 | 86 | 86 | 86 | 86 | 86 | 86 | 86 | 86 | 86 | 86 | 86 | 86 | 86 | 86 | 86 | 86 | 86 | 86 | 86 | 86 | 86 | 86 | 86 | 86 | 86 | 86 | 86 | 86 | 86 | 86 | 86 | 86 | 86 | 86 | 86 | 86 | 86 | 86 | 86 | 86 | 86 | 86 | 86 | 86 | 86 | 86 | 86 | 86 | 86 | 86 | 86 | 86 | 86 | 86 | 86 | 86 | 86 | 86 | 86 | 86 | 86 | 86 | 86 | 86 | 86 | 86 | 86 | 86 | 86 | 86 | 86 | 86 | 86 | 86 | 86 | 86 | 86 | 86 | 86 | 86 | 86 | 86 | 86 | 86 | 86 | 86 | 86 | 86 | 86 | 86 | 86 | 86 | 86 | 86 | 86 | 86 | 86 | 86 | 86 | 86 | 86 | 86 | 86 | 86 | 86 | 86 | 86 | 86 | 86 | 86 | 86 | 86 | 86 | 86 | 86 | 86 | 86 | 86 | 86 | 86 | 86 | 86 | 86 | 86 | 86 | 86 | 86 | 86 | 86 | 86 | 86 | 86 | 86 | 86 | 86 | 86 | 86 | 86 | 86 | 86 | 86 | 86 | 86 | 86 | 86 | 86 | 86 | 86 | 86 | 86 | 86 | 86 | 86 | 86 | 86 | 86 | 86 | 86 | 86 | 86 | 86 | 86 | 86 | 86 | 86 | 86 | 86 | 86 | 86 | 86 | 86 | 86 | 86 | 86 | 86 | 86 | 86 | 86 | 86 | 86 | 86 | 86 | 86 | 86 | 86 | 86 | 86 | 86 | 86 | 86 | 86 | 86 | 86 | 86 | 86 | 86 | 86 | 86 | 86 | 86 | 86 | 86 | 86 | 86 | 86 | 86 | 86 | 86 | 86 | 86 | 86 | 86 | 86 | 86 | 86 | 86 | 86 | 86 | 86 | 86 | 86 | 86 | 86 | 86 | 86 | 86 | 86 | 86 | 86 | 86 | 86 | 86 | 86 | 86 | 86 | 86 | 86 | 86 | 86 | 86 | 86 | 86 | 86 | 86 | 86 | 86 | 86 | 86 | 86 | 86 | 86 | 86 | 86 | 86 | 86 | 86 | 86 | 86 | 86 | 86 | 86 | 86 | 86 | 86 | 86 | 86 | 86 | 86 | 86 | 86 | 86 | 86 | 86 | 86 | 86 | 86 | 86 | 86 | 86 | 86 | 86 | 86 | 86 | 86 | 86 | 86 | 86 | 86 | 86 | 86 | 86 | 86 | 86 | 86 | 86 | 86 | 86 | 86 | 86 | 86 | 86 | 86 | 86 | 86 | 86 | 86 | 86 | 86 | 86 | 86 | 86 | 86 | 86 | 86 | 86 | 86 | 86 | 86 | 86 | 86 | 86 | 86 | 86 | 86 | 86 | 86 | 86 | 86 | 86 | 86 | 86 | 86 | 86 | 86 | 86 | 86 | 86 | 86 | 86 | 86 | 86 | 86 | 86 | 86 | 86 | 86 | 86 | 86 | 86 | 86 | 86 | 86 | 86 | 86 | 86 | 86 | 86 | 86 | 86 | 86 | 86 | 86 | 86 | 86 | 86 | 86 | 86 | 86 | 86 | 86 | 86 | 86 | 86 | 86 | 86 | 86 | 86 | 86 | 86 | 86 | 86 | 86 | 86 | 86 | 86 | 86 | 86 | 86 | 86 | 86 | 86 | 86 | 86 | 86 | 86 | 86 | 86 | 86 | 86 | 86 | 86 | 86 | 86 | 86 | 86 | 86 | 86 | 86 | 86 | 86 | 86 | 86 | 86 | 86 | 86 | 86 | 86 | 86 | 86 | 86 | 86 | 86 | 86 | 86 | 86 | 86 | 86 | 86 | 86 | 86 | 86 | 86 | 86 | 86 | 86 | 86 | 86 | 86 | 86 | 86 | 86 | 86 | 86 | 86 | 86 | 86 | 86 | 86 | 86 | 86 | 86 | 86 | 86 | 86 | 86 | 86 | 86 | 86 | 86 | 86 | 86 | 86 | 86 | 86 | 86 | 86 | 86 | 86 |



**C. CCHFV L segment nucleotide percentage identities.** Complete ORFs were aligned and pairwise percentage identities was calculated using CLUSTAL Omega.

|                   |    | MF511204_ZAF_1985 | Mbarara_UGA_2019 | DQ211624_DRC_1956 | DQ076412_UGA_1958 | KX013483_UGA_1958 | MN930408_IND_2019 | AY720893_TJK_1990 | KX013447_UZB_1967 | DQ211619_OMN_1997 | MG659722_CHN_2017 | JN627865_IND_2011 | HM452307_AFG_2009 | AY422208_PAK_1976 | AY947890_IRQ_1979 | FJ562095_CHN_2004 | GU477492_CHN_2004 | DQ211623_TUR_2003 | GQ337055_TUR_2006 | EU044832_KOS_2001 | DQ211617_RUS_1967 | AY675240_RUS_2002 | AY995166_RUS_2003 | DQ211618_RUS_1967 | DQ211613_SEN_1969 | DQ211614_SEN_1972 | KX013450_NGA_1965 | DQ076417_ZAF_1981 | DQ211622_ZAF_1985 | DQ211620_ZAF_1985 | MF547417_ESP_2014 | DQ211615_MRT_1984 | MF287638_ESP_2016 | KX238956_NGA_2012 | HQ378183_SDN_2009 | AY422209_NGA_1966 | DQ211621_ZAF_1987 | MF511201_NAM_1987 | HQ378180_SDN_2008 | DQ211612_GRC_1975 |    |    |    |
|-------------------|----|-------------------|------------------|-------------------|-------------------|-------------------|-------------------|-------------------|-------------------|-------------------|-------------------|-------------------|-------------------|-------------------|-------------------|-------------------|-------------------|-------------------|-------------------|-------------------|-------------------|-------------------|-------------------|-------------------|-------------------|-------------------|-------------------|-------------------|-------------------|-------------------|-------------------|-------------------|-------------------|-------------------|-------------------|-------------------|-------------------|-------------------|-------------------|-------------------|----|----|----|
| MF511204_ZAF_1985 |    | 92                | 92               | 92                | 92                | 92                | 84                | 84                | 84                | 84                | 84                | 84                | 85                | 84                | 84                | 85                | 85                | 84                | 84                | 84                | 84                | 84                | 84                | 84                | 84                | 84                | 84                | 84                | 84                | 84                | 84                | 84                | 84                | 84                | 84                | 84                | 84                | 84                | 84                | 84                | 84 | 78 |    |
| Mbarara_UGA_2019  | 92 |                   |                  | 94                | 94                | 94                | 84                | 84                | 84                | 84                | 84                | 84                | 84                | 84                | 84                | 84                | 85                | 84                | 84                | 84                | 84                | 84                | 84                | 84                | 84                | 84                | 83                | 83                | 83                | 84                | 84                | 84                | 84                | 84                | 84                | 84                | 84                | 84                | 84                | 84                | 84 | 78 |    |
| DQ211624_DRC_1956 | 92 | 94                |                  |                   | 96                | 94                | 84                | 84                | 84                | 84                | 84                | 84                | 84                | 84                | 84                | 84                | 85                | 85                | 84                | 84                | 84                | 84                | 84                | 84                | 84                | 84                | 84                | 83                | 83                | 84                | 84                | 84                | 83                | 83                | 84                | 83                | 84                | 84                | 84                | 84                | 84 | 78 |    |
| DQ076412_UGA_1958 | 92 | 94                | 96               |                   |                   | 98                | 84                | 84                | 84                | 84                | 84                | 84                | 84                | 85                | 84                | 84                | 85                | 85                | 84                | 84                | 84                | 84                | 84                | 84                | 84                | 84                | 84                | 83                | 84                | 83                | 84                | 84                | 83                | 83                | 83                | 83                | 83                | 84                | 84                | 84                | 84 | 78 |    |
| KX013483_UGA_1958 | 92 | 94                | 94               | 98                |                   |                   | 84                | 84                | 84                | 84                | 84                | 84                | 84                | 84                | 84                | 84                | 84                | 85                | 84                | 84                | 84                | 84                | 84                | 84                | 84                | 84                | 84                | 83                | 83                | 83                | 83                | 84                | 83                | 83                | 83                | 83                | 83                | 83                | 83                | 83                | 83 | 78 |    |
| MN930408_IND_2019 | 84 | 84                | 84               | 84                | 84                | 84                |                   | 97                | 97                | 88                | 88                | 88                | 89                | 89                | 89                | 89                | 88                | 88                | 88                | 88                | 88                | 88                | 88                | 88                | 88                | 87                | 87                | 87                | 87                | 87                | 87                | 87                | 87                | 87                | 87                | 87                | 87                | 87                | 87                | 87                | 87 | 86 | 78 |
| AY720893_TJK_1990 | 84 | 84                | 84               | 84                | 84                | 84                | 97                |                   | 98                | 88                | 88                | 88                | 89                | 89                | 89                | 89                | 88                | 88                | 88                | 88                | 88                | 88                | 88                | 88                | 88                | 87                | 87                | 86                | 87                | 87                | 87                | 87                | 87                | 87                | 87                | 87                | 87                | 87                | 87                | 87                | 87 | 86 | 78 |
| KX013447_UZB_1967 | 84 | 84                | 84               | 84                | 84                | 84                | 97                | 98                |                   | 88                | 88                | 88                | 89                | 89                | 89                | 89                | 88                | 88                | 88                | 88                | 88                | 88                | 88                | 88                | 88                | 87                | 87                | 86                | 87                | 87                | 87                | 87                | 87                | 87                | 87                | 87                | 87                | 87                | 87                | 87                | 87 | 86 | 78 |
| DQ211619_OMN_1997 | 84 | 84                | 84               | 84                | 84                | 84                | 88                | 88                | 88                |                   | 92                | 92                | 92                | 92                | 92                | 92                | 87                | 87                | 87                | 87                | 87                | 87                | 87                | 87                | 87                | 87                | 86                | 86                | 86                | 87                | 87                | 87                | 87                | 87                | 87                | 87                | 87                | 87                | 87                | 87                | 87 | 86 | 79 |
| MG659722_CHN_2017 | 84 | 84                | 84               | 84                | 84                | 84                | 88                | 88                | 88                | 92                |                   | 95                | 95                | 92                | 92                | 92                | 88                | 88                | 87                | 87                | 87                | 87                | 87                | 87                | 87                | 86                | 86                | 86                | 86                | 86                | 86                | 86                | 86                | 86                | 86                | 86                | 86                | 86                | 86                | 86                | 86 | 86 | 79 |
| JN627865_IND_2011 | 84 | 84                | 84               | 84                | 84                | 84                | 89                | 89                | 89                | 92                | 95                |                   | 98                | 92                | 92                | 92                | 88                | 88                | 87                | 87                | 87                | 88                | 88                | 88                | 88                | 87                | 87                | 86                | 87                | 87                | 87                | 87                | 87                | 87                | 87                | 87                | 87                | 87                | 87                | 87                | 87 | 79 |    |
| HM452307_AFG_2009 | 85 | 84                | 84               | 85                | 84                | 84                | 89                | 89                | 89                | 92                | 95                | 98                |                   | 92                | 92                | 92                | 88                | 88                | 87                | 87                | 88                | 88                | 88                | 88                | 88                | 87                | 87                | 86                | 87                | 87                | 87                | 87                | 87                | 87                | 87                | 87                | 87                | 87                | 87                | 87                | 87 | 79 |    |
| AY422208_PAK_1976 | 84 | 84                | 84               | 84                | 84                | 84                | 89                | 89                | 89                | 92                | 92                | 92                | 92                |                   | 92                | 92                | 88                | 88                | 87                | 87                | 88                | 88                | 87                | 87                | 87                | 87                | 87                | 86                | 86                | 87                | 87                | 87                | 87                | 87                | 87                | 87                | 87                | 87                | 87                | 87                | 79 |    |    |
| AY947890_IRQ_1979 | 84 | 84                | 84               | 84                | 84                | 84                | 89                | 89                | 89                | 92                | 92                | 92                | 92                | 92                |                   | 92                | 88                | 88                | 87                | 87                | 88                | 88                | 88                | 88                | 88                | 87                | 87                | 86                | 87                | 87                | 87                | 87                | 87                | 87                | 87                | 87                | 87                | 87                | 87                | 87                | 87 | 78 |    |
| FJ562095_CHN_2004 | 85 | 85                | 85               | 85                | 84                | 84                | 88                | 88                | 88                | 87                | 88                | 88                | 88                | 88                | 88                |                   | 99                | 88                | 88                | 89                | 89                | 88                | 88                | 88                | 88                | 88                | 87                | 87                | 88                | 88                | 88                | 88                | 88                | 88                | 88                | 88                | 88                | 88                | 88                | 88                | 88 | 78 |    |
| GU477492_CHN_2004 | 85 | 85                | 85               | 85                | 85                | 85                | 88                | 88                | 88                | 87                | 88                | 88                | 88                | 88                | 88                | 88                | 99                |                   | 89                | 89                | 89                | 89                | 88                | 89                | 89                | 88                | 88                | 87                | 88                | 88                | 88                | 88                | 88                | 88                | 88                | 88                | 88                | 88                | 88                | 88                | 88 | 78 |    |
| DQ211623_TUR_2003 | 84 | 84                | 84               | 84                | 84                | 84                | 88                | 88                | 88                | 87                | 87                | 87                | 87                | 87                | 87                | 88                | 89                |                   | 99                | 96                | 96                | 96                | 96                | 96                | 96                | 90                | 90                | 89                | 89                | 90                | 90                | 90                | 90                | 90                | 90                | 90                | 90                | 90                | 90                | 90                | 89 | 78 |    |
| GQ337055_TUR_2006 | 84 | 84                | 84               | 84                | 84                | 84                | 87                | 87                | 88                | 87                | 87                | 87                | 87                | 87                | 87                | 88                | 89                | 99                |                   | 96                | 96                | 96                | 96                | 96                | 96                | 89                | 89                | 89                | 89                | 90                | 90                | 90                | 90                | 90                | 90                | 90                | 90                | 90                | 90                | 90                | 90 | 88 |    |
| EU044832_KOS_2001 | 84 | 84                | 84               | 84                | 84                | 84                | 88                | 88                | 88                | 87                | 87                | 87                | 88                | 87                | 88                | 89                | 89                | 96                | 96                |                   | 97                | 96                | 96                | 96                | 97                | 90                | 90                | 89                | 90                | 90                | 90                | 90                | 90                | 90                | 90                | 90                | 90                | 90                | 90                | 90                | 90 | 78 |    |
| DQ211617_RUS_1967 | 84 | 84                | 84               | 84                | 84                | 84                | 88                | 88                | 88                | 87                | 87                | 88                | 88                | 88                | 88                | 89                | 89                | 96                | 96                | 97                |                   | 98                | 99                | 99                | 99                | 90                | 89                | 89                | 89                | 90                | 90                | 90                | 90                | 90                | 90                | 90                | 90                | 90                | 90                | 90                | 90 | 78 |    |
| AY675240_RUS_2002 | 84 | 84                | 84               | 84                | 84                | 84                | 88                | 88                | 88                | 87                | 87                | 88                | 88                | 87                | 88                | 88                | 88                | 96                | 96                | 96                | 98                |                   | 99                | 99                | 90                | 89                | 89                | 89                | 90                | 90                | 90                | 90                | 90                | 90                | 90                | 90                | 90                | 90                | 90                | 90                | 90 | 78 |    |
| AY995166_RUS_2003 | 84 | 84                | 84               | 84                | 84                | 84                | 88                | 88                | 88                | 87                | 87                | 88                | 88                | 87                | 88                | 88                | 89                | 96                | 96                | 96                | 99                | 99                |                   | 100               | 90                | 89                | 89                | 90                | 90                | 90                | 90                | 90                | 90                | 90                | 90                | 90                | 90                | 90                | 90                | 90                | 90 | 89 | 78 |
| DQ211618_RUS_1967 | 84 | 84                | 84               | 84                | 84                | 84                | 88                | 88                | 88                | 87                | 87                | 88                | 88                | 87                | 88                | 88                | 89                | 96                | 96                | 97                | 99                | 99                | 100               |                   | 90                | 89                | 89                | 90                | 90                | 90                | 90                | 90                | 90                | 90                | 90                | 90                | 90                | 90                | 90                | 90                | 90 | 89 | 78 |
| DQ211613_SEN_1969 | 84 | 84                | 84               | 84                | 84                | 84                | 87                | 87                | 87                | 87                | 86                | 87                | 87                | 87                | 87                | 88                | 88                | 90                | 89                | 90                | 90                | 90                | 90                | 90                |                   | 98                | 92                | 93                | 95                | 95                | 98                | 98                | 98                | 98                | 98                | 98                | 98                | 98                | 93                | 94                | 93 | 78 |    |
| DQ211614_SEN_1972 | 84 | 83                | 83               | 83                | 83                | 83                | 87                | 87                | 87                | 86                | 86                | 87                | 87                | 87                | 87                | 87                | 88                | 90                | 89                | 90                | 89                | 89                | 89                | 89                | 98                |                   | 92                | 93                | 95                | 95                | 98                | 98                | 98                | 98                | 98                | 98                | 98                | 93                | 93                | 93                | 93 | 78 |    |
| KX013450_NGA_1965 | 84 | 83                | 83               | 84                | 83                | 87                | 86                | 86                | 86                | 86                | 86                | 86                | 86                | 86                | 86                | 87                | 87                | 89                | 89                | 89                | 89                | 89                | 89                | 89                | 92                | 92                |                   | 92                | 92                | 92                | 92                | 92                | 92                | 92                | 92                | 92                | 92                | 92                | 92                | 92                | 78 |    |    |
| DQ076417_ZAF_1981 | 84 | 83                | 83               | 83                | 83                | 87                | 87                | 87                | 87                | 86                | 86                | 87                | 87                | 86                | 87                | 88                | 88                | 89                | 89                | 90                | 89                | 89                | 90                | 90                | 93                | 93                | 92                |                   | 93                | 93                | 93                | 93                | 93                | 93                | 93                | 93                | 93                | 93                | 93                | 93                | 93 | 92 | 78 |
| DQ211622_ZAF_1985 | 84 | 84                | 84               | 84                | 83                | 87                | 87                | 87                | 87                | 87                | 86                | 87                | 87                | 87                | 87                | 88                | 88                | 90                | 90                | 90                | 90                | 90                | 90                | 90                | 95                | 95                | 92                | 93                |                   | 99                | 95                | 95                | 95                | 95                | 95                | 95                | 95                | 95                | 93                | 93                | 93 | 78 |    |
| DQ211620_ZAF_1985 | 84 | 84                | 84               | 84                | 84                | 87                | 87                | 87                | 87                | 87                | 86                | 87                | 87                | 87                | 87                | 88                | 88                | 90                | 89                | 90                | 90                | 90                | 90                | 90                | 95                | 95                | 92                | 93                | 99                |                   | 95                | 95                | 95                | 95                | 95                | 95                | 95                | 95                | 93                | 93                | 93 | 78 |    |
| MF547417_ESP_2014 | 84 | 84                | 83               | 84                | 83                | 87                | 87                | 87                | 87                | 86                | 86                | 87                | 87                | 87                | 87                | 88                | 88                | 90                | 89                | 90                | 90                | 89                | 90                | 90                | 98                | 98                | 92                | 93                | 95                | 95                |                   | 99                | 98                | 98                | 98                | 98                | 93                | 93                | 93                | 93                | 78 |    |    |
| DQ211615_MRT_1984 | 84 | 83                | 83               | 83                | 83                | 87                | 87                | 87                | 87                | 86                | 86                | 87                | 87                | 87                | 87                | 88                | 88                | 90                | 90                | 90                | 90                | 90                | 90                | 90                | 98                | 98                | 92                | 93                | 95                | 95                | 99                |                   | 99                | 99                | 99                | 98                | 93                | 93                | 93                | 93                | 78 |    |    |
| MF287638_ESP_2016 | 84 | 84                | 84               | 83                | 83                | 87                | 87                | 87                | 87                | 86                | 86                | 87                | 87                | 87                | 87                | 88                | 88                | 90                | 90                | 90                | 90                | 90                | 90                | 90                | 98                | 98                | 92                | 93                | 95                | 95                | 98                | 99                |                   | 99                | 99                | 98                | 93                | 94                | 93                | 93                | 78 |    |    |
| KX238956_NGA_2012 | 84 | 83                | 83               | 83                | 83                | 87                | 87                | 87                | 87                | 86                | 86                | 87                | 87                | 87                | 87                | 88                | 88                | 90                | 89                | 90                | 90                | 90                | 90                | 90                | 98                | 98                | 92                | 93                | 95                | 95                | 98                | 99                | 99                |                   | 99                | 98                | 93                | 93                | 93                | 93                | 78 |    |    |
| HQ378183_SDN_2009 | 84 | 84                | 84               | 84                | 83                | 87                | 87                | 87                | 87                | 86                | 86                | 87                | 87                | 87                | 87                | 88                | 88                | 90                | 90                | 90                | 90                | 90                | 90                | 90                | 98                | 98                | 92                | 93                | 95                | 95                | 98                | 99                | 99                | 99                |                   | 98                | 93                | 94                | 93                | 93                | 79 |    |    |
| AY422209_NGA_1966 | 84 | 84                | 83               | 84                | 83                | 87                | 87                | 87                | 87                | 87                | 86                | 87                | 87                | 87                | 87                | 88                | 88                | 90                | 90                | 90                | 90                | 90                | 90                | 90                | 98                | 98                | 92                | 93                | 95                | 95                | 98                | 98                | 98                | 98                | 98                |                   | 93                | 93                | 93                | 93                | 78 |    |    |
| DQ211621_ZAF_1987 | 84 | 84                | 84               | 84                | 83                | 87                | 87                | 87                | 87                | 87                | 87                | 87                | 87                | 87                | 88                | 88                | 90                | 90                | 90                | 90                | 90                | 90                | 90                | 90                | 93                | 93                | 93                | 93                | 93                | 93                | 93                | 93                | 93                | 93                | 93                | 93                |                   | 94                | 93                | 94                | 79 |    |    |
| MF511201_NAM_1987 | 84 | 83                | 83               | 83                | 83                | 87                | 87                | 87                | 87                | 86                | 87                | 87                | 87                | 87                | 87                | 88                | 88                | 90                | 90                | 90                | 90                | 90                | 90                | 90                | 94                | 93                | 93                | 93                | 93                | 93                | 93                | 93                | 94                | 93                | 94                | 93                | 94                |                   | 94                | 78                |    |    |    |
| HQ378180_SDN_2008 | 84 | 84                | 84               | 84                |                   |                   |                   |                   |                   |                   |                   |                   |                   |                   |                   |                   |                   |                   |                   |                   |                   |                   |                   |                   |                   |                   |                   |                   |                   |                   |                   |                   |                   |                   |                   |                   |                   |                   |                   |                   |    |    |    |
