# Supplementary material for: Phylogenetic Characterisation of Crimean-Congo Hemorrhagic Fever Virus Detected in African Blue Ticks Feeding on Cattle in a Ugandan Abattoir
Source: Preprints.org preprint supplement (doi:10.20944/preprints202102.0089.v1), 2021-02-02
Supplement: Supplementary file 1 [file supplementary]

## Sheet: Sheet2
Table S1. List of collected tick specimens
Lab #	Tick spp	Site of collection	Host	Nairovirus RT-PCR
GT001	Rh. appendiculatus	NASONGOLA	GOAT	Negative
GT002	Rh. appendiculatus	NASONGOLA	GOAT	Negative
GT003	Rh. appendiculatus	NASONGOLA	GOAT	Negative
GT004	Rh. appendiculatus	NASONGOLA	GOAT	Negative
GT005	Rh. appendiculatus	NASONGOLA	GOAT	Negative
GT006	Rh. decoloratus	NASONGOLA	GOAT	Negative
GT007	Rh. decoloratus	NASONGOLA	GOAT	Negative
GT008	Rh. decoloratus	NASONGOLA	GOAT	Negative
GT009	Rh. decoloratus	NASONGOLA	GOAT	Negative
GT010	Rh. decoloratus	NASONGOLA	GOAT	Negative
CW011	Rh. decoloratus	NASONGOLA	COW	Negative
CW012	Rh. decoloratus	NASONGOLA	COW	Negative
CW013	Rh. decoloratus	NASONGOLA	COW	Negative
CW014	Rh. decoloratus	NASONGOLA	COW	Negative
GT015	Rh. appendiculatus	NASONGOLA	GOAT	Negative
CW016	Rh. decoloratus	NASONGOLA	COW	Negative
CW017	Rh. decoloratus	NASONGOLA	COW	Negative
CW018	Rh. decoloratus	NASONGOLA	COW	Negative
CW019	Rh. decoloratus	NASONGOLA	COW	Negative
CW020	Rh. decoloratus	NASONGOLA	COW	Negative
CW021	Rh. decoloratus	NASONGOLA	COW	Negative
CW022	Rh. decoloratus	NASONGOLA	COW	Positive
CW023	Rh. decoloratus	MBARARA	COW	Positive
CW024	Rh. decoloratus	MBARARA	COW	Positive
CW025	Rh. decoloratus	MBARARA	COW	Negative
CW026	Rh. decoloratus	MBARARA	COW	Positive
CW027	Rh. decoloratus	MBARARA	COW	Positive
CW028	Rh. decoloratus	MBARARA	COW	Positive
CW029	Rh. decoloratus	MBARARA	COW	Positive
CW030	Rh. decoloratus	MBARARA	COW	Positive
CW031	Rh. decoloratus	MBARARA	COW	Negative
CW032	Rh. decoloratus	MBARARA	COW	Negative
CW033	Rh. decoloratus	MBARARA	COW	Negative
CW034	Rh. decoloratus	MBARARA	COW	Negative
CW035	Rh. decoloratus	MBARARA	COW	Negative
CW036	Rh. decoloratus	MBARARA	COW	Negative
CW037	Rh. decoloratus	MBARARA	COW	Negative
CW038	Rh. decoloratus	MBARARA	COW	Negative
CW039	Rh. decoloratus	MBARARA	COW	Negative
CW040	Rh. decoloratus	MBARARA	COW	Negative
CW041	Am. variegatum	SOROTI	COW	Negative
GT042	Am. variegatum	SOROTI	GOAT	Negative
GT043	Am. variegatum	SOROTI	GOAT	Negative
GT044	Am. variegatum	SOROTI	GOAT	Negative
CW045	Am. variegatum	SOROTI	GOAT	Negative
GT046	Am. variegatum	SOROTI	GOAT	Negative
GT047	Am. variegatum	SOROTI	GOAT	Negative
GT048	Am. variegatum	SOROTI	GOAT	Negative
GT049	Am. variegatum	SOROTI	GOAT	Negative
GT050	Am. variegatum	SOROTI	GOAT	Negative
GT051	Am. variegatum	SOROTI	GOAT	Negative
CW052	Am. variegatum	SOROTI	COW	Negative
CW053	Am. variegatum	SOROTI	COW	Negative
CW054	Am. variegatum	SOROTI	COW	Negative
CW055	Rh. decoloratus	SOROTI	COW	Negative
CW056	Rh. decoloratus	SOROTI	COW	Negative
CW057	Rh. decoloratus	SOROTI	COW	Negative
CW058	Rh. decoloratus	SOROTI	COW	Negative
CW059	Rh. decoloratus	SOROTI	COW	Negative
CW060	Rh. decoloratus	SOROTI	COW	Negative
PG061	Rh. appendiculatus	WAMBIZZI	PIG	Negative
CW062	Rh. appendiculatus	NAKASEKE	COW	Negative
CW063	Rh. appendiculatus	NAKASEKE	COW	Negative
CW064	Rh. appendiculatus	NAKASEKE	COW	Negative
CW065	Rh. appendiculatus	NAKASEKE	COW	Negative
CW066	Rh. appendiculatus	NAKASEKE	COW	Negative
CW067	Rh. appendiculatus	NAKASEKE	COW	Negative
CW068	Rh. appendiculatus	NAKASEKE	COW	Negative
CW069	Rh. appendiculatus	NAKASEKE	COW	Negative
CW070	Rh. appendiculatus	NAKASEKE	COW	Negative
